# Supplementary material
Source: MDPI journal article supplement (https://www.mdpi.com/2071-1050/15/23/16411)
Supplement: s1 [file s1]

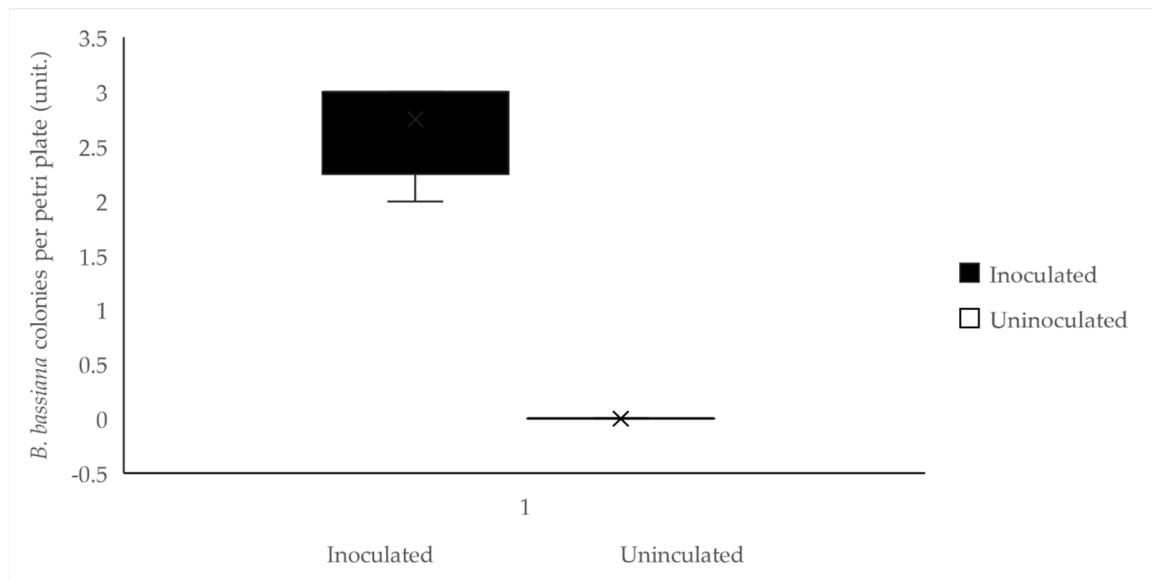

Figure S1. Mean colony count of *B. bassiana* obtained per plant on Petri dishes, originating from leaves of Eucalyptus seedlings, inoculated and uninoculated.
